# Supplementary material
Source: PubMed Central journal article supplement (PMC8855708)
Supplement: NIHMS1776878-supplement-SI.pdf [file NIHMS1776878-supplement-SI.pdf]

## Supplementary Information

### Probing Side-chain Dynamics in Proteins by NMR Relaxation of Isolated $^{13}\text{C}$ Magnetization Modes in $^{13}\text{CH}_3$ Methyl Groups

Vitali Tugarinov,\* Alberto Ceccon and G. Marius Clore\*

Laboratory of Chemical Physics, National Institute of Diabetes and Digestive and Kidney  
Diseases, National Institutes of Health, Bethesda, Maryland 20892-0520, USA

#### Relaxation rates of $^{13}\text{C}$ magnetization modes in a $^{13}\text{CH}_3$ spin-system.

Below we provide differential equations that describe the  $R_2(C_{\pm})$  and  $R_1(C_z)$  relaxation decay processes due to intra-methyl spin interactions within a  $^{13}\text{CH}_3$  spin-system, calculated using the basis set comprising all the magnetization modes in Eq. 1 of the main text.

$R_2$  relaxation due to  $^{13}\text{C}$ - $^1\text{H}$  dipolar interactions:

$$\begin{aligned}
 \frac{d}{dt} \begin{bmatrix} L_1 + L_4 \\ L_2 + L_3 \\ L_5 + L_6 \\ L_1 - L_4 \\ L_2 - L_3 \\ L_5 - L_6 \end{bmatrix} &= -k_{\text{CH}} \left\{ \begin{aligned} &J_{\text{CH}}^{\text{auto}}(0) \begin{bmatrix} 1/2 & 0 & 0 & 0 & 0 & 0 \\ 0 & 5/18 & \sqrt{2}/9 & 0 & 0 & 0 \\ 0 & \sqrt{2}/9 & 7/18 & 0 & 0 & 0 \\ 0 & 0 & 0 & 1/2 & 0 & 0 \\ 0 & 0 & 0 & 0 & 5/18 & \sqrt{2}/9 \\ 0 & 0 & 0 & 0 & \sqrt{2}/9 & 7/18 \end{bmatrix} + J_{\text{CH}}^{\text{auto}}(\omega_C) \begin{bmatrix} 3/8 & 0 & 0 & 0 & 0 & 0 \\ 0 & 3/8 & 0 & 0 & 0 & 0 \\ 0 & 0 & 3/8 & 0 & 0 & 0 \\ 0 & 0 & 0 & 3/8 & 0 & 0 \\ 0 & 0 & 0 & 0 & 3/8 & 0 \\ 0 & 0 & 0 & 0 & 0 & 3/8 \end{bmatrix} + \\ &J_{\text{CH}}^{\text{auto}}(\omega_H) \begin{bmatrix} 3/8 & 1/8 & \sqrt{2}/8 & 0 & 0 & 0 \\ 1/8 & 13/24 & \sqrt{2}/24 & 0 & 0 & 0 \\ \sqrt{2}/8 & \sqrt{2}/24 & 7/12 & 0 & 0 & 0 \\ 0 & 0 & 0 & 3/8 & 1/8 & \sqrt{2}/8 \\ 0 & 0 & 0 & 1/8 & 5/24 & -\sqrt{2}/24 \\ 0 & 0 & 0 & \sqrt{2}/8 & -\sqrt{2}/24 & 1/6 \end{bmatrix} + J_{\text{CH}}^{\text{auto}}(\omega_C + \omega_H) \begin{bmatrix} 3/4 & 0 & 0 & 0 & 0 & 0 \\ 0 & 3/4 & 0 & 0 & 0 & 0 \\ 0 & 0 & 3/4 & 0 & 0 & 0 \\ 0 & 0 & 0 & 3/4 & 0 & 0 \\ 0 & 0 & 0 & 0 & 3/4 & 0 \\ 0 & 0 & 0 & 0 & 0 & 3/4 \end{bmatrix} + \\ &+ J_{\text{CH}}^{\text{auto}}(\omega_H - \omega_C) \begin{bmatrix} 1/8 & 0 & 0 & 0 & 0 & 0 \\ 0 & 1/8 & 0 & 0 & 0 & 0 \\ 0 & 0 & 1/8 & 0 & 0 & 0 \\ 0 & 0 & 0 & 1/8 & 0 & 0 \\ 0 & 0 & 0 & 0 & 1/8 & 0 \\ 0 & 0 & 0 & 0 & 0 & 1/8 \end{bmatrix} \end{aligned} \right\} \begin{bmatrix} L_1 + L_4 \\ L_2 + L_3 \\ L_5 + L_6 \\ L_1 - L_4 \\ L_2 - L_3 \\ L_5 - L_6 \end{bmatrix} \\
 \\ \\
 -k_{\text{CH}} \left\{ \begin{aligned} &J_{\text{CH}}^{\text{cross}}(0) \begin{bmatrix} 1 & 0 & 0 & 0 & 0 & 0 \\ 0 & -1/9 & -\sqrt{2}/9 & 0 & 0 & 0 \\ 0 & -\sqrt{2}/9 & -2/9 & 0 & 0 & 0 \\ 0 & 0 & 0 & 1 & 0 & 0 \\ 0 & 0 & 0 & 0 & -1/9 & -\sqrt{2}/9 \\ 0 & 0 & 0 & 0 & -\sqrt{2}/9 & -2/9 \end{bmatrix} + J_{\text{CH}}^{\text{cross}}(\omega_C) \begin{bmatrix} 3/4 & 0 & 0 & 0 & 0 & 0 \\ 0 & -1/4 & 0 & 0 & 0 & 0 \\ 0 & 0 & -1/4 & 0 & 0 & 0 \\ 0 & 0 & 0 & 3/4 & 0 & 0 \\ 0 & 0 & 0 & 0 & -1/4 & 0 \\ 0 & 0 & 0 & 0 & 0 & -1/4 \end{bmatrix} + \\ &J_{\text{CH}}^{\text{cross}}(\omega_H) \begin{bmatrix} 0 & 1/4 & -\sqrt{2}/8 & 0 & 0 & 0 \\ 1/4 & 5/6 & -\sqrt{2}/24 & 0 & 0 & 0 \\ -\sqrt{2}/8 & -\sqrt{2}/24 & -1/3 & 0 & 0 & 0 \\ 0 & 0 & 0 & 0 & 1/4 & -\sqrt{2}/8 \\ 0 & 0 & 0 & 1/4 & 1/6 & \sqrt{2}/24 \\ 0 & 0 & 0 & -\sqrt{2}/8 & \sqrt{2}/24 & -1/6 \end{bmatrix} + J_{\text{CH}}^{\text{cross}}(\omega_C + \omega_H) \begin{bmatrix} 0 & 0 & 0 & 0 & 0 & 0 \\ 0 & 1 & 0 & 0 & 0 & 0 \\ 0 & 0 & -1/2 & 0 & 0 & 0 \\ 0 & 0 & 0 & 0 & 0 & 0 \\ 0 & 0 & 0 & 0 & 1 & 0 \\ 0 & 0 & 0 & 0 & 0 & -1/2 \end{bmatrix} \begin{bmatrix} L_1 + L_4 \\ L_2 + L_3 \\ L_5 + L_6 \\ L_1 - L_4 \\ L_2 - L_3 \\ L_5 - L_6 \end{bmatrix} + \\ &+ J_{\text{CH}}^{\text{cross}}(\omega_H - \omega_C) \begin{bmatrix} 0 & 0 & 0 & 0 & 0 & 0 \\ 0 & 1/6 & 0 & 0 & 0 & 0 \\ 0 & 0 & -1/12 & 0 & 0 & 0 \\ 0 & 0 & 0 & 0 & 0 & 0 \\ 0 & 0 & 0 & 0 & 1/6 & 0 \\ 0 & 0 & 0 & 0 & 0 & -1/12 \end{bmatrix} \end{aligned} \right\} \begin{bmatrix} L_1 + L_4 \\ L_2 + L_3 \\ L_5 + L_6 \\ L_1 - L_4 \\ L_2 - L_3 \\ L_5 - L_6 \end{bmatrix}
 \end{aligned}$$

$R_1$  relaxation due to  $^{13}\text{C}$ - $^1\text{H}$  dipolar interactions:

$$\begin{aligned}
 \frac{d}{dt} \begin{bmatrix} L_1 + L_4 \\ L_2 + L_3 \\ L_5 + L_6 \\ L_1 - L_4 \\ L_2 - L_3 \\ L_5 - L_6 \end{bmatrix} &= -k_{\text{CH}} \left\{ \begin{array}{l} J_{\text{CH}}^{\text{auto}}(0) \\ J_{\text{CH}}^{\text{auto}}(\omega_H) \\ + J_{\text{CH}}^{\text{auto}}(\omega_H - \omega_C) \end{array} \begin{bmatrix} 0 & 0 & 0 & 0 & 0 & 0 \\ 0 & 2/9 & -\sqrt{2}/9 & 0 & 0 & 0 \\ 0 & -\sqrt{2}/9 & 1/9 & 0 & 0 & 0 \\ 0 & 0 & 0 & 0 & 0 & 0 \\ 0 & 0 & 0 & 0 & 2/9 & -\sqrt{2}/9 \\ 0 & 0 & 0 & 0 & -\sqrt{2}/9 & 1/9 \end{bmatrix} + \begin{array}{l} J_{\text{CH}}^{\text{auto}}(\omega_C) \\ J_{\text{CH}}^{\text{auto}}(\omega_C + \omega_H) \end{array} \begin{bmatrix} 3/4 & 0 & 0 & 0 & 0 & 0 \\ 0 & 5/12 & \sqrt{2}/6 & 0 & 0 & 0 \\ 0 & \sqrt{2}/6 & 7/12 & 0 & 0 & 0 \\ 0 & 0 & 0 & 3/4 & 0 & 0 \\ 0 & 0 & 0 & 0 & 5/12 & \sqrt{2}/6 \\ 0 & 0 & 0 & 0 & \sqrt{2}/6 & 7/12 \end{bmatrix} + \begin{array}{l} J_{\text{CH}}^{\text{auto}}(\omega_H) \\ + J_{\text{CH}}^{\text{auto}}(\omega_H - \omega_C) \end{array} \begin{bmatrix} 3/8 & -1/8 & -\sqrt{2}/8 & 0 & 0 & 0 \\ -1/8 & 5/24 & -\sqrt{2}/24 & 0 & 0 & 0 \\ -\sqrt{2}/8 & -\sqrt{2}/24 & 1/6 & 0 & 0 & 0 \\ 0 & 0 & 0 & 3/8 & -1/8 & -\sqrt{2}/8 \\ 0 & 0 & 0 & -1/8 & 13/24 & \sqrt{2}/24 \\ 0 & 0 & 0 & -\sqrt{2}/8 & \sqrt{2}/24 & 7/12 \end{bmatrix} + \begin{array}{l} J_{\text{CH}}^{\text{auto}}(\omega_C) \\ + J_{\text{CH}}^{\text{auto}}(\omega_C + \omega_H) \end{array} \begin{bmatrix} 3/4 & 1/4 & \sqrt{2}/4 & 0 & 0 & 0 \\ 1/4 & 13/12 & \sqrt{2}/12 & 0 & 0 & 0 \\ \sqrt{2}/4 & \sqrt{2}/12 & 7/6 & 0 & 0 & 0 \\ 0 & 0 & 0 & 3/4 & 1/4 & \sqrt{2}/4 \\ 0 & 0 & 0 & 1/4 & 5/12 & -\sqrt{2}/12 \\ 0 & 0 & 0 & \sqrt{2}/4 & -\sqrt{2}/12 & 1/3 \end{bmatrix} \begin{bmatrix} L_1 + L_4 \\ L_2 + L_3 \\ L_5 + L_6 \\ L_1 - L_4 \\ L_2 - L_3 \\ L_5 - L_6 \end{bmatrix} \\
 &+ \begin{array}{l} J_{\text{CH}}^{\text{auto}}(\omega_H - \omega_C) \end{array} \begin{bmatrix} 1/8 & 1/24 & \sqrt{2}/24 & 0 & 0 & 0 \\ 1/24 & 13/72 & \sqrt{2}/72 & 0 & 0 & 0 \\ \sqrt{2}/24 & \sqrt{2}/72 & 7/36 & 0 & 0 & 0 \\ 0 & 0 & 0 & 1/8 & 1/24 & \sqrt{2}/24 \\ 0 & 0 & 0 & 1/24 & 5/72 & -\sqrt{2}/72 \\ 0 & 0 & 0 & \sqrt{2}/24 & -\sqrt{2}/72 & 1/18 \end{bmatrix} \begin{bmatrix} L_1 + L_4 \\ L_2 + L_3 \\ L_5 + L_6 \\ L_1 - L_4 \\ L_2 - L_3 \\ L_5 - L_6 \end{bmatrix} \\
 \\
 -k_{\text{CH}} \left\{ \begin{array}{l} J_{\text{CH}}^{\text{cross}}(0) \\ J_{\text{CH}}^{\text{cross}}(\omega_H) \\ + J_{\text{CH}}^{\text{cross}}(\omega_H - \omega_C) \end{array} \begin{bmatrix} 0 & 0 & 0 & 0 & 0 & 0 \\ 0 & -2/9 & \sqrt{2}/9 & 0 & 0 & 0 \\ 0 & \sqrt{2}/9 & -1/9 & 0 & 0 & 0 \\ 0 & 0 & 0 & 0 & 0 & 0 \\ 0 & 0 & 0 & 0 & -2/9 & \sqrt{2}/9 \\ 0 & 0 & 0 & 0 & \sqrt{2}/9 & -1/9 \end{bmatrix} + \begin{array}{l} J_{\text{CH}}^{\text{cross}}(\omega_C) \\ J_{\text{CH}}^{\text{cross}}(\omega_C + \omega_H) \end{array} \begin{bmatrix} 3/2 & 0 & 0 & 0 & 0 & 0 \\ 0 & -1/6 & -\sqrt{2}/6 & 0 & 0 & 0 \\ 0 & -\sqrt{2}/6 & -1/3 & 0 & 0 & 0 \\ 0 & 0 & 0 & 3/2 & 0 & 0 \\ 0 & 0 & 0 & 0 & -1/6 & -\sqrt{2}/6 \\ 0 & 0 & 0 & 0 & -\sqrt{2}/6 & -1/3 \end{bmatrix} + \begin{array}{l} J_{\text{CH}}^{\text{cross}}(\omega_H) \\ + J_{\text{CH}}^{\text{cross}}(\omega_H - \omega_C) \end{array} \begin{bmatrix} 0 & -1/4 & \sqrt{2}/8 & 0 & 0 & 0 \\ -1/4 & 1/6 & \sqrt{2}/24 & 0 & 0 & 0 \\ \sqrt{2}/8 & \sqrt{2}/24 & -1/6 & 0 & 0 & 0 \\ 0 & 0 & 0 & 0 & -1/4 & \sqrt{2}/8 \\ 0 & 0 & 0 & -1/4 & 5/6 & -\sqrt{2}/24 \\ 0 & 0 & 0 & \sqrt{2}/8 & -\sqrt{2}/24 & -1/3 \end{bmatrix} + \begin{array}{l} J_{\text{CH}}^{\text{cross}}(\omega_C) \\ + J_{\text{CH}}^{\text{cross}}(\omega_C + \omega_H) \end{array} \begin{bmatrix} 0 & 1/2 & -\sqrt{2}/4 & 0 & 0 & 0 \\ 1/2 & 5/3 & -\sqrt{2}/12 & 0 & 0 & 0 \\ -\sqrt{2}/4 & -\sqrt{2}/12 & -2/3 & 0 & 0 & 0 \\ 0 & 0 & 0 & 0 & 1/2 & -\sqrt{2}/4 \\ 0 & 0 & 0 & 1/2 & 1/3 & \sqrt{2}/12 \\ 0 & 0 & 0 & -\sqrt{2}/4 & \sqrt{2}/12 & -1/3 \end{bmatrix} \begin{bmatrix} L_1 + L_4 \\ L_2 + L_3 \\ L_5 + L_6 \\ L_1 - L_4 \\ L_2 - L_3 \\ L_5 - L_6 \end{bmatrix} \\
 &+ \begin{array}{l} J_{\text{CH}}^{\text{cross}}(\omega_H - \omega_C) \end{array} \begin{bmatrix} 0 & 1/12 & -\sqrt{2}/24 & 0 & 0 & 0 \\ 1/12 & 5/18 & -\sqrt{2}/72 & 0 & 0 & 0 \\ -\sqrt{2}/24 & -\sqrt{2}/72 & -1/9 & 0 & 0 & 0 \\ 0 & 0 & 0 & 0 & 1/12 & -\sqrt{2}/24 \\ 0 & 0 & 0 & 1/12 & 1/18 & \sqrt{2}/72 \\ 0 & 0 & 0 & -\sqrt{2}/24 & \sqrt{2}/72 & -1/18 \end{bmatrix} \begin{bmatrix} L_1 + L_4 \\ L_2 + L_3 \\ L_5 + L_6 \\ L_1 - L_4 \\ L_2 - L_3 \\ L_5 - L_6 \end{bmatrix}
 \end{aligned}$$

$R_1$  and  $R_2$  relaxation due to  $^1\text{H}$ - $^1\text{H}$  dipolar interactions:

$$\begin{aligned}
 \frac{d}{dt} \begin{bmatrix} L_1 + L_4 \\ L_2 + L_3 \\ L_5 + L_6 \\ L_1 - L_4 \\ L_2 - L_3 \\ L_5 - L_6 \end{bmatrix} &= -k_{\text{HH}} \left\{ \begin{array}{l} J_{\text{HH}}^{\text{auto}}(0) \\ + J_{\text{HH}}^{\text{auto}}(2\omega_H) \end{array} \right. \begin{bmatrix} 0 & 0 & 0 & 0 & 0 & 0 \\ 0 & 1/2 & -\sqrt{2}/4 & 0 & 0 & 0 \\ 0 & -\sqrt{2}/4 & 1/4 & 0 & 0 & 0 \\ 0 & 0 & 0 & 0 & 0 & 0 \\ 0 & 0 & 0 & 0 & 1/2 & -\sqrt{2}/4 \\ 0 & 0 & 0 & 0 & -\sqrt{2}/4 & 1/4 \end{bmatrix} \\
 &+ J_{\text{HH}}^{\text{auto}}(\omega_H) \begin{bmatrix} 3/4 & -1/2 & -\sqrt{2}/8 & 0 & 0 & 0 \\ -1/2 & 5/4 & -3\sqrt{2}/8 & 0 & 0 & 0 \\ -\sqrt{2}/8 & -3\sqrt{2}/8 & 1/2 & 0 & 0 & 0 \\ 0 & 0 & 0 & 3/4 & -1/2 & -\sqrt{2}/8 \\ 0 & 0 & 0 & -1/2 & 5/4 & 3\sqrt{2}/8 \\ 0 & 0 & 0 & -\sqrt{2}/8 & 3\sqrt{2}/8 & 1/2 \end{bmatrix} \\
 &+ J_{\text{HH}}^{\text{cross}}(0) \begin{bmatrix} 3/2 & -1/2 & -\sqrt{2}/2 & 0 & 0 & 0 \\ -1/2 & 1/2 & 0 & 0 & 0 & 0 \\ -\sqrt{2}/2 & 0 & 1/2 & 0 & 0 & 0 \\ 0 & 0 & 0 & 3/2 & 1/2 & \sqrt{2}/2 \\ 0 & 0 & 0 & 1/2 & 1/2 & 0 \\ 0 & 0 & 0 & \sqrt{2}/2 & 0 & 1/2 \end{bmatrix} \\
 &+ J_{\text{HH}}^{\text{cross}}(2\omega_H) \begin{bmatrix} 3/2 & -1/2 & -\sqrt{2}/2 & 0 & 0 & 0 \\ -1/2 & 1/2 & 0 & 0 & 0 & 0 \\ -\sqrt{2}/2 & 0 & 1/2 & 0 & 0 & 0 \\ 0 & 0 & 0 & 3/2 & 1/2 & \sqrt{2}/2 \\ 0 & 0 & 0 & 1/2 & 1/2 & 0 \\ 0 & 0 & 0 & \sqrt{2}/2 & 0 & 1/2 \end{bmatrix} \begin{bmatrix} L_1 + L_4 \\ L_2 + L_3 \\ L_5 + L_6 \\ L_1 - L_4 \\ L_2 - L_3 \\ L_5 - L_6 \end{bmatrix} \\
 \\
 -k_{\text{HH}} \left\{ \begin{array}{l} J_{\text{HH}}^{\text{cross}}(0) \\ + J_{\text{HH}}^{\text{cross}}(\omega_H) \end{array} \right. \begin{bmatrix} 0 & 0 & 0 & 0 & 0 & 0 \\ 0 & -1/2 & \sqrt{2}/4 & 0 & 0 & 0 \\ 0 & \sqrt{2}/4 & -1/4 & 0 & 0 & 0 \\ 0 & 0 & 0 & 0 & 0 & 0 \\ 0 & 0 & 0 & 0 & -1/2 & \sqrt{2}/4 \\ 0 & 0 & 0 & 0 & \sqrt{2}/4 & -1/4 \end{bmatrix} \\
 &+ J_{\text{HH}}^{\text{cross}}(\omega_H) \begin{bmatrix} 3/4 & -1 & \sqrt{2}/8 & 0 & 0 & 0 \\ -1 & 1/4 & 3\sqrt{2}/8 & 0 & 0 & 0 \\ \sqrt{2}/8 & 3\sqrt{2}/8 & -1/2 & 0 & 0 & 0 \\ 0 & 0 & 0 & 3/4 & -1 & \sqrt{2}/8 \\ 0 & 0 & 0 & -1 & 1/4 & -3\sqrt{2}/8 \\ 0 & 0 & 0 & \sqrt{2}/8 & -3\sqrt{2}/8 & -1/2 \end{bmatrix} \\
 &+ J_{\text{HH}}^{\text{cross}}(2\omega_H) \begin{bmatrix} 0 & -1 & \sqrt{2}/2 & 0 & 0 & 0 \\ -1 & 1 & 0 & 0 & 0 & 0 \\ \sqrt{2}/2 & 0 & -1/2 & 0 & 0 & 0 \\ 0 & 0 & 0 & 0 & 1 & -\sqrt{2}/2 \\ 0 & 0 & 0 & 1 & 1 & 0 \\ 0 & 0 & 0 & -\sqrt{2}/2 & 0 & -1/2 \end{bmatrix} \begin{bmatrix} L_1 + L_4 \\ L_2 + L_3 \\ L_5 + L_6 \\ L_1 - L_4 \\ L_2 - L_3 \\ L_5 - L_6 \end{bmatrix}
 \end{aligned}$$

where  $k_{\text{CH}} = \left(\frac{\mu_0}{4\pi}\right)^2 \frac{6\hbar^2 \gamma_{\text{H}}^2 \gamma_{\text{C}}^2 \tau_{\text{C}}}{r_{\text{CH}}^6}$ ;  $k_{\text{HH}} = \left(\frac{\mu_0}{4\pi}\right)^2 \frac{6\hbar^2 \gamma_{\text{H}}^4 \tau_{\text{C}}}{r_{\text{HH}}^6}$ ;  $\mu_0$  is the vacuum permeability constant,  $\gamma_{\text{H}}$

and  $\gamma_{\text{C}}$ , gyromagnetic ratios of proton and carbon spins, respectively;  $r_{\text{HH}}$  and  $r_{\text{CH}}$ ,  $^1\text{H}$ - $^1\text{H}$  and  $^{13}\text{C}$ - $^1\text{H}$  internuclear distances in a methyl group, and  $\tau_{\text{C}}$  the global molecular rotational correlation time (assumed isotropic). Auto- and cross-correlated relaxation spectral density functions  $J(\omega)$  are labelled by the superscripts ‘auto’ and ‘cross’, respectively, while the subscripts denote the type of interaction (‘HH’ for  $^1\text{H}$ - $^1\text{H}$  interactions, and ‘CH’ for  $^{13}\text{C}$ - $^1\text{H}$  interactions). The spectral density function used throughout this work has the following ‘model-free’<sup>1,2</sup> form,<sup>3</sup>

$$J_{\mu\nu}(\omega) = \frac{1}{5} \left\{ S_{axis}^2 S_{axis,\mu} S_{axis,\nu} \frac{\tau_c}{1 + (\omega\tau_c)^2} + [P_2(\cos\theta_{\mu,\nu}) - S_{axis}^2 S_{axis,\mu} S_{axis,\nu}] \frac{\tau_e}{1 + (\omega\tau_e)^2} \right\} \quad (S1)$$

where  $\tau_e^{-1} = \tau_c^{-1} + \tau_f^{-1}$ ; the indices ‘ $\mu$ ’ and ‘ $\nu$ ’ denote the type of interaction ( $\mu = \nu$  and  $\mu \neq \nu$  for ‘auto’- and ‘cross’-correlated spectral density functions, respectively);  $P_2(\cos(x)) = (1/2)[3\cos^2(x) - 1]$ ,  $S_{axis,a} = P_2(\cos(\theta_{axis,a}))$ , and  $\theta_{axis,a}$  is the angle subtended by the methyl symmetry axis and vector  $a$  connecting a pair of spins. For example, for  $^{13}\text{C}$ - $^1\text{H}$  interactions,  $S_{axis,a} = P_2(\cos(\theta_{axis,CH})) = -1/3$ , while for  $^1\text{H}$ - $^1\text{H}$  interactions,  $S_{axis,a} = P_2(\cos(\theta_{axis,HH})) = -1/2$ .

In addition, all the  $^{13}\text{C}$  magnetization modes relax due to methyl  $^{13}\text{C}$  chemical shift anisotropy (CSA), with the corresponding rates given by,

$$R_{2,\text{csa}} = k_{\text{csa}} \{ (2/3)J_{\text{csa}}(0) + (1/2)J_{\text{csa}}(\omega_C) \} \quad (S2.1)$$

$$R_{1,\text{csa}} = k_{\text{csa}} J_{\text{csa}}(\omega_C) \quad (S2.2)$$

where

$$k_{\text{csa}} = \frac{1}{3} (\omega_C \Delta_C)^2, \Delta_C \text{ is methyl } ^{13}\text{C} \text{ CSA, and}$$

$$J_{\text{csa}}(\omega) = \frac{2}{5} \left\{ S_{axis}^2 \frac{\tau_c}{1 + (\omega\tau_c)^2} + (1 - S_{axis}^2) \frac{\tau_e}{1 + (\omega\tau_e)^2} \right\}, \quad (S2.3)$$

while no cross-relaxation between  $^{13}\text{C}$  magnetization modes occurs due to this mechanism.

Earlier, Kay and Bull<sup>4</sup> derived relaxation matrices for transverse  $^{13}\text{C}$  relaxation in  $\text{AX}_3(^{13}\text{CH}_3)$  spin-systems albeit using a slightly different basis set. No secular approximation has been used in the derivation of the relaxation matrices above (the modes can cross-relax even if they have different precession frequencies). Note that methyl- $^{13}\text{C}$  CSA/ $^{13}\text{C}$ - $^1\text{H}$  dipolar cross correlated relaxation is the only mechanism by which the in-phase modes can cross-relax with the anti-phase modes in the basis of Eq. 1 (main text). We did not include these cross-correlations in the calculations above as they are eliminated by application of  $^1\text{H}$   $180^\circ$  pulses during relaxation delays in the experiments described in this work (hence, the block-diagonal structure of the relaxation matrices above). As long as (1) one of the  $^{13}\text{C}$

magnetization modes is isolated before the relaxation period, and (2) not excessively long relaxation delays are used in relaxation measurements, the decay of each of  $^{13}\text{C}$  modes is single-exponential to a good approximation. Below we list the relaxation rates of the  $^{13}\text{C}$  magnetization modes that are used for derivation of methyl axis dynamics parameters in this work, in the ‘single-exponential’ limit (preserving only the diagonal elements of the relaxation matrices above).

**( $L_5 + L_6$ ) mode:**

$$\begin{aligned}
R_2 = & k_{\text{CH}} \{ (7/18) J_{\text{CH}}^{\text{auto}}(0) - (2/9) J_{\text{CH}}^{\text{cross}}(0) + (3/8) J_{\text{CH}}^{\text{auto}}(\omega_C) - (1/4) J_{\text{CH}}^{\text{cross}}(\omega_C) + \\
& (3/4) J_{\text{CH}}^{\text{auto}}(\omega_C + \omega_H) - (1/2) J_{\text{CH}}^{\text{cross}}(\omega_C + \omega_H) + (1/8) J_{\text{CH}}^{\text{auto}}(\omega_H - \omega_C) - (1/12) J_{\text{CH}}^{\text{cross}}(\omega_H - \omega_C) + \\
& (7/12) J_{\text{CH}}^{\text{auto}}(\omega_H) - (1/3) J_{\text{CH}}^{\text{cross}}(\omega_H) \} + \\
& k_{\text{HH}} \{ (1/4) J_{\text{HH}}^{\text{auto}}(0) - (1/4) J_{\text{HH}}^{\text{cross}}(0) + (1/2) J_{\text{HH}}^{\text{auto}}(\omega_H) - (1/2) J_{\text{HH}}^{\text{cross}}(\omega_H) + \\
& (1/2) J_{\text{HH}}^{\text{auto}}(2\omega_H) - (1/2) J_{\text{HH}}^{\text{cross}}(2\omega_H) \} + \\
& k_{\text{csa}} \{ (2/3) J_{\text{csa}}(0) + (1/2) J_{\text{csa}}(\omega_C) \}; \tag{S3.1}
\end{aligned}$$

$$\begin{aligned}
R_1 = & k_{\text{CH}} \{ (1/9) J_{\text{CH}}^{\text{auto}}(0) - (1/9) J_{\text{CH}}^{\text{cross}}(0) + (7/12) J_{\text{CH}}^{\text{auto}}(\omega_C) - (1/3) J_{\text{CH}}^{\text{cross}}(\omega_C) + \\
& (7/6) J_{\text{CH}}^{\text{auto}}(\omega_C + \omega_H) - (2/3) J_{\text{CH}}^{\text{cross}}(\omega_C + \omega_H) + (7/36) J_{\text{CH}}^{\text{auto}}(\omega_H - \omega_C) - (1/9) J_{\text{CH}}^{\text{cross}}(\omega_H - \omega_C) + \\
& (1/6) J_{\text{CH}}^{\text{auto}}(\omega_H) - (1/6) J_{\text{CH}}^{\text{cross}}(\omega_H) \} + \\
& k_{\text{HH}} \{ (1/4) J_{\text{HH}}^{\text{auto}}(0) - (1/4) J_{\text{HH}}^{\text{cross}}(0) + (1/2) J_{\text{HH}}^{\text{auto}}(\omega_H) - (1/2) J_{\text{HH}}^{\text{cross}}(\omega_H) + \\
& (1/2) J_{\text{HH}}^{\text{auto}}(2\omega_H) - (1/2) J_{\text{HH}}^{\text{cross}}(2\omega_H) \} + \\
& k_{\text{csa}} J_{\text{csa}}(\omega_C); \tag{S3.2}
\end{aligned}$$

**( $L_1 \pm L_4$ ) modes:**

$$\begin{aligned}
R_2 = & k_{\text{CH}} \{ (1/2) J_{\text{CH}}^{\text{auto}}(0) + J_{\text{CH}}^{\text{cross}}(0) + (3/8) J_{\text{CH}}^{\text{auto}}(\omega_C) + (3/4) J_{\text{CH}}^{\text{cross}}(\omega_C) + \\
& (3/4) J_{\text{CH}}^{\text{auto}}(\omega_C + \omega_H) + (1/8) J_{\text{CH}}^{\text{auto}}(\omega_H - \omega_C) + (3/8) J_{\text{CH}}^{\text{auto}}(\omega_H) \} + \\
& k_{\text{HH}} \{ (3/4) J_{\text{HH}}^{\text{auto}}(\omega_H) + (3/4) J_{\text{HH}}^{\text{cross}}(\omega_H) + (3/2) J_{\text{HH}}^{\text{auto}}(2\omega_H) \} + \\
& k_{\text{csa}} \{ (2/3) J_{\text{csa}}(0) + (1/2) J_{\text{csa}}(\omega_C) \} + k_{\text{HH}}^{\text{ext}}; \tag{S4.1}
\end{aligned}$$

$$\begin{aligned}
R_1 = & k_{\text{CH}} \{ (3/4) J_{\text{CH}}^{\text{auto}}(\omega_C) + (3/2) J_{\text{CH}}^{\text{cross}}(\omega_C) + \\
& (3/4) J_{\text{CH}}^{\text{auto}}(\omega_C + \omega_H) + (1/8) J_{\text{CH}}^{\text{auto}}(\omega_H - \omega_C) + (3/8) J_{\text{CH}}^{\text{auto}}(\omega_H) \} + \\
& k_{\text{HH}} \{ (3/4) J_{\text{HH}}^{\text{auto}}(\omega_H) + (3/4) J_{\text{HH}}^{\text{cross}}(\omega_H) + (3/2) J_{\text{HH}}^{\text{auto}}(2\omega_H) \} + \\
& k_{\text{csa}} J_{\text{csa}}(\omega_C) + k_{\text{HH}}^{\text{ext}}; \tag{S4.2}
\end{aligned}$$

where  $k_{\text{HH}}^{\text{ext}} = \left(\frac{3}{20}\right) \left(\frac{\mu_0}{4\pi}\right)^2 \sum_{\text{ext}} \frac{6\hbar^2 \gamma_H^4 \tau_C}{r_{\text{hhext}}^6}$  (see main text).

The differences  $\Delta$  between  $R_2/R_1$  of the  $(L_2 - L_3)$  and  $(L_2 + L_3)$  modes (see also Eq. 2 of the main text) are described by,

$$\Delta R_2 = R_{2,(L_2 - L_3)} - R_{2,(L_2 + L_3)} = (8/3) k_{\text{HH}}^{\text{ext}} - k_{\text{CH}} \{ (1/3) J_{\text{CH}}^{\text{auto}}(\omega_H) + (2/3) J_{\text{CH}}^{\text{cross}}(\omega_H) \} \approx (8/3) k_{\text{HH}}^{\text{ext}} \quad (\text{S5.1})$$

and

$$\begin{aligned} \Delta R_1 = R_{1,(L_2 - L_3)} - R_{1,(L_2 + L_3)} = & (8/3) k_{\text{HH}}^{\text{ext}} + k_{\text{CH}} \{ (1/3) J_{\text{CH}}^{\text{auto}}(\omega_H) + (2/3) J_{\text{CH}}^{\text{cross}}(\omega_H) - \\ & (2/3) J_{\text{CH}}^{\text{auto}}(\omega_C + \omega_H) - (4/3) J_{\text{CH}}^{\text{cross}}(\omega_C + \omega_H) - \\ & (1/9) J_{\text{CH}}^{\text{auto}}(\omega_H - \omega_C) - (2/9) J_{\text{CH}}^{\text{cross}}(\omega_H - \omega_C) \} \approx (8/3) k_{\text{HH}}^{\text{ext}} \end{aligned} \quad (\text{S5.2})$$

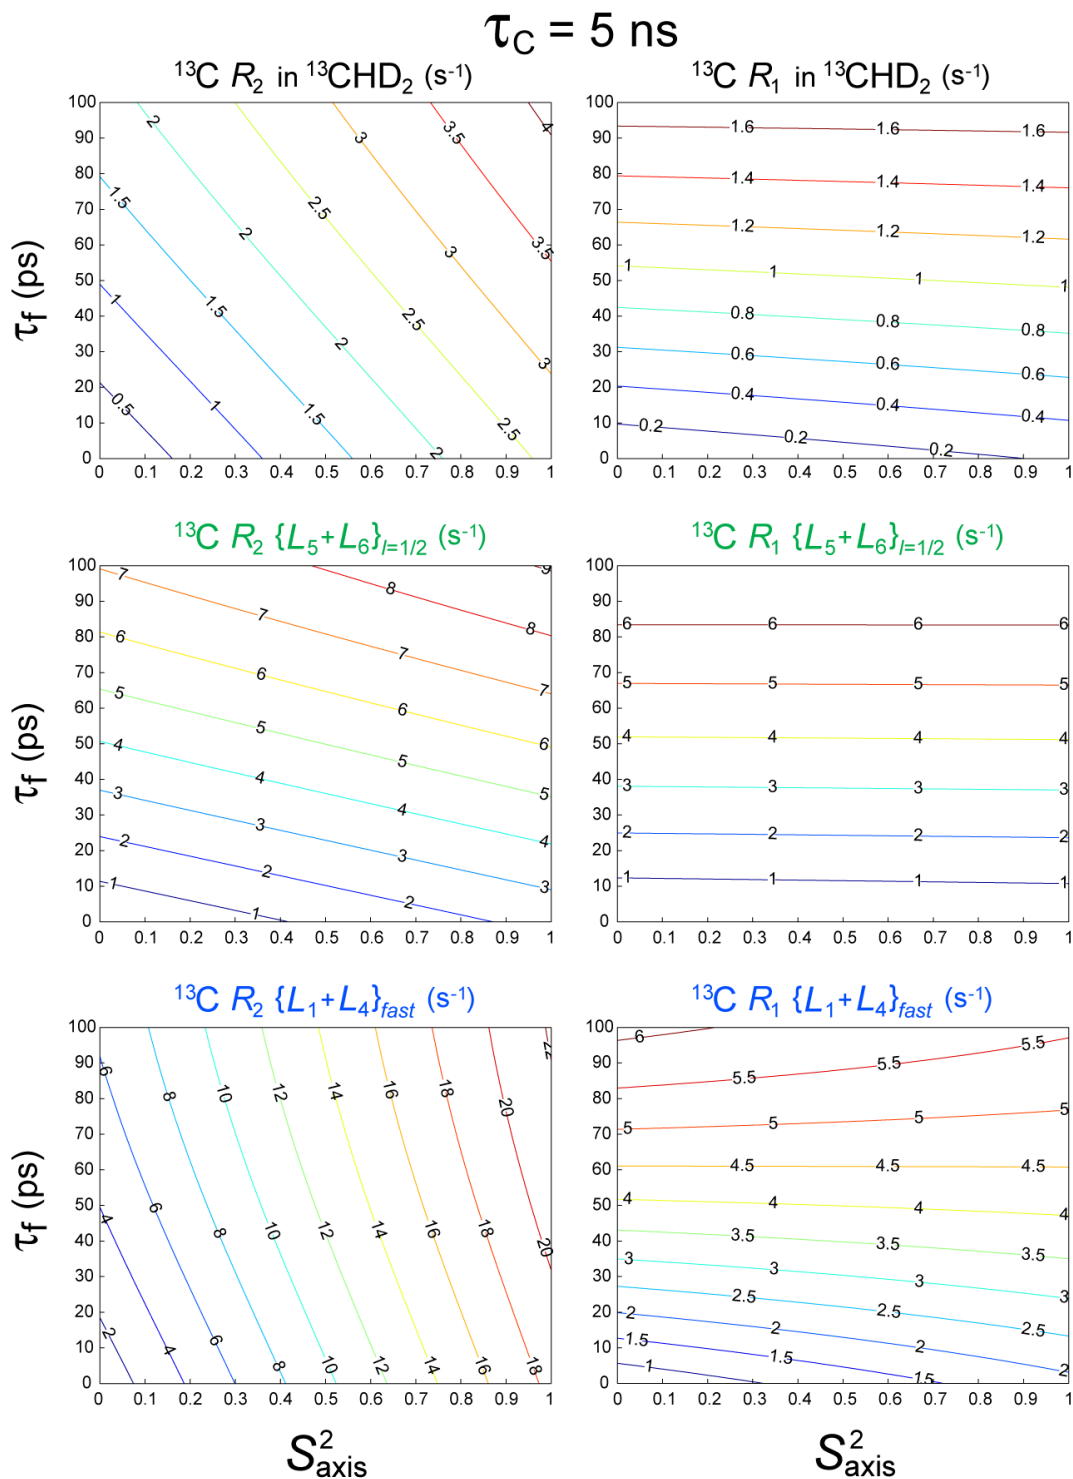

**Figure S1.** Contour plots of  $R_2$  (left column; s $^{-1}$ ) and  $R_1$  (right column; s $^{-1}$ ) relaxation rates of  $^{13}\text{C}$  nuclei in  $^{13}\text{CHD}_2$  methyl groups (upper row), the  $\{L_5 + L_6\}$  magnetization mode ( $I = 1/2$  manifold; middle row), and the  $\{L_1 + L_4\}$  magnetization mode (bottom row) calculated as a function of  $S^2_{\text{axis}}$  (x-axis) and  $\tau_f$  (y-axis; ps) for the global correlation time  $\tau_C = 5 \text{ ns}$ . Calculations were performed using the parameters of methyl geometry listed in ‘Materials and Methods’ section below. The rates of the  $\{L_1 + L_4\}$  mode were calculated assuming the distance to a single external proton spin,  $r_{\text{hext}} = 3.0 \text{ \AA}$ .



$$\tau_C = 60 \text{ ns}$$

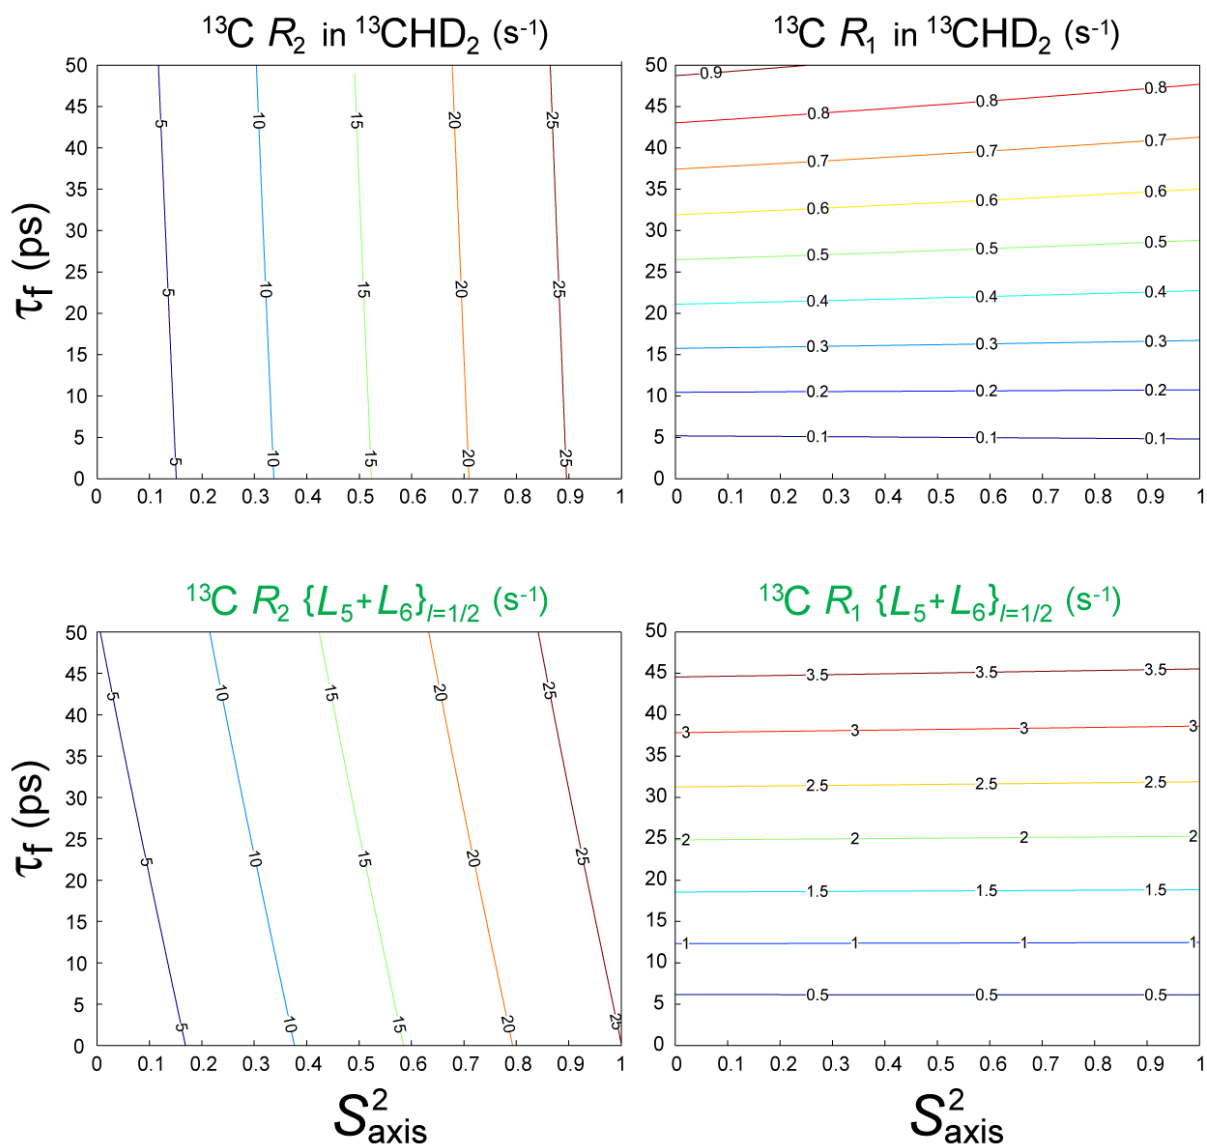

**Figure S2.** Contour plots of  $R_2$  (left column;  $\text{s}^{-1}$ ) and  $R_1$  (right column;  $\text{s}^{-1}$ ) relaxation rates of  $^{13}\text{C}$  nuclei in  $^{13}\text{CHD}_2$  methyl groups (upper row), and the  $(L_5 + L_6)$  magnetization mode ( $I = 1/2$  manifold; bottom row), calculated as a function of  $S^2_{\text{axis}}$  ( $x$ -axis) and  $\tau_f$  ( $y$ -axis; ps) for the global correlation time  $\tau_C = 60$  ns. Calculations were performed using the parameters of methyl geometry listed in the ‘Materials and Methods’ section.

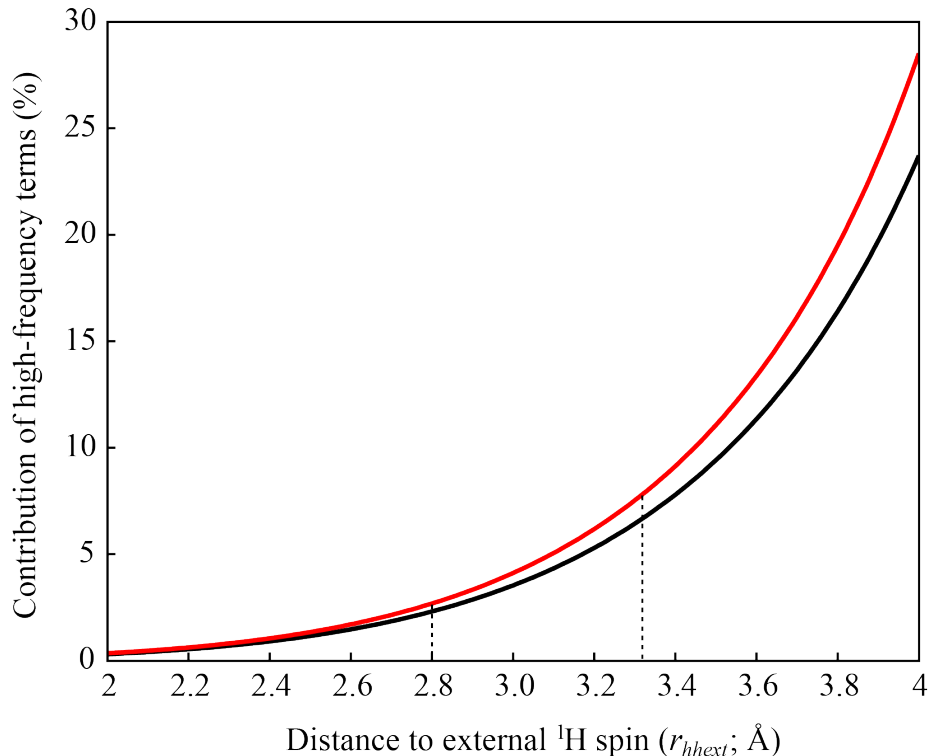

**Figure S3.** Plot showing the absolute magnitude of contributions of high frequency ( $\omega > 0$ ) terms (in %;  $y$ -axis) to the differences  $\Delta$  for  $R_2$  (black curve, Eq. S5.1) and  $R_1$  (red curve, Eq. S5.2) relaxation rates, plotted as a function of the distance to a single external  $^1\text{H}$  spin ( $r_{hhext}$ , in Å;  $y$ -axis) for ubiquitin at 25 °C ( $\tau_c = 5$  ns). Calculations were performed using a standard set of average methyl axis dynamics parameters:  $S^2_{\text{axis}} = 0.6$ , and  $\tau_f = 40$  ps; the form of the spectral density function is given by Eq. S1; the parameters of methyl geometry are listed in the ‘Materials and Methods’ section of the SI; and the  $^1\text{H}$  spectrometer frequency is 600 MHz. Approximate distances to the external  $^1\text{H}$  spin corresponding to the average ( $2.1 \text{ s}^{-1}$ ) and minimal ( $0.9 \text{ s}^{-1}$ ) values of  $\Delta$  measured for ubiquitin at 25 °C ( $r_{hhext} = 2.8 \text{ Å}$  and  $3.3 \text{ Å}$ , respectively) are indicated by dashed vertical lines. Note that smaller contributions of high-frequency terms to  $\Delta$  for  $R_2/R_1$  rates are expected at lower temperatures (higher  $\tau_c$  values).

### Optimization of flip-angles in the pulse schemes of Figures 5 and 6.

The density matrix describing the state of the magnetization in a  $^{13}\text{CH}_3$  spin-system can be represented as a tensor product,  $C \otimes \rho$ , where  $C \in \{C_x, C_y, C_z, E\}$ ,  $C_l$  is a  $^{13}\text{C}$  spin operator,  $E$  is the 2x2 identity matrix, and  $\rho$  describes the state of  $^1\text{H}$  magnetization. The latter is constructed from a basis set of 8  $^1\text{H}$  eigenstates  $|n\rangle$  formed by linear combinations of  $|i,j,k\rangle$  ( $i,j,k \in \{\alpha,\beta\}$ ) (see Fig. 1; main text). Further, the density matrix  $\rho$  and  $^1\text{H}$  RF pulse operators can be separated into two parts corresponding to the  $I = 3/2$  ( $\rho^{3/2}$ ) and  $I = 1/2$  ( $\rho^{1/2}$ ) manifolds, as they evolve independently of each other under the effect of RF field. Here, we concentrate on the transformations of the matrix  $\rho^{3/2}$ , as  $\rho^{1/2}$  is 'taken out of the picture' by selection of the fast relaxing (outer)  $^1\text{H}$  transitions at the start of the schemes in Figs. 5 and 6, keeping in mind that the state of the full (8x8) density matrix describing the magnetization of the  $I = 3/2$  manifold, can be obtained by the tensor product above.

**The scheme for isolation of the ( $L_1 \pm L_4$ ) magnetization mode in Fig. 5 (main text).** Following isolation of the fast-relaxing (outer)  $^1\text{H}$  transitions (prior to the  $^1\text{H}_y$  pulse with flip-angle  $\beta$  shown in blue in Fig. 5), the density matrix is given by,

$$\rho_F^{3/2} = \begin{bmatrix} 0 & \sqrt{3}/2 & 0 & 0 \\ \sqrt{3}/2 & 0 & 0 & 0 \\ 0 & 0 & 0 & \sqrt{3}/2 \\ 0 & 0 & \sqrt{3}/2 & 0 \end{bmatrix} \quad (\text{S6})$$

Using the procedures of analytical matrix exponentiation described previously,<sup>5</sup> we can express the density matrix after the  $^1\text{H}_y$  pulse with flip-angle  $\beta$  and the subsequent pulsed field gradient ( $g'$ ; Fig. 5) as,

$$\rho^{3/2}(\beta) = \frac{1}{4} \begin{bmatrix} -3\sin\beta(\cos^2\beta+1) & 0 & 0 & 0 \\ 0 & 3\sin\beta(3\cos^2\beta-1) & 0 & 0 \\ 0 & 0 & -3\sin\beta(3\cos^2\beta-1) & 0 \\ 0 & 0 & 0 & 3\sin\beta(\cos^2\beta+1) \end{bmatrix} \quad (\text{S7})$$

where only diagonal elements are retained after the pulsed field gradient. Clearly, when  $\beta = \cos^{-1}(1/\sqrt{3}) = 54.7^\circ$  ('magic' angle), only the outer  $^1\text{H}$  states (elements [1,1] and [4,4] of the matrix in Eq. S7) are polarized.

**The scheme for isolation of the ( $L_2 \pm L_3$ ) magnetization mode in Fig. 6 (main text).** Following the pulsed-field gradient  $g_{10}$  in the scheme of Fig. 6 (prior to the  $^1\text{H}_y$  pulse with flip-angle  $\gamma$  shown in red), the signal can be described to within a multiplicative factor by a density matrix given by,

$$\rho_s^{3/2} = \begin{bmatrix} 0 & 0 & 0 & 0 \\ 0 & 1 & 0 & 0 \\ 0 & 0 & -1 & 0 \\ 0 & 0 & 0 & 0 \end{bmatrix} \quad (\text{S8})$$

After the application of the  $^1\text{H}_y$  pulse with flip-angle  $\gamma$  and the cycling of its phase ( $\phi_6$ ) with concomitant inversion of the receiver phase, the density matrix takes the form,

$$\rho_s^{3/2}(\gamma) = \frac{1}{4} \begin{bmatrix} 0 & -\sqrt{3} \sin \gamma (3 \cos^2 \gamma - 1) & 0 & -\sin^3 \gamma \\ -\sqrt{3} \sin \gamma (3 \cos^2 \gamma - 1) & 0 & \sin \gamma (8 - 9 \sin^2 \gamma) & 0 \\ 0 & \sin \gamma (8 - 9 \sin^2 \gamma) & 0 & -\sqrt{3} \sin \gamma (3 \cos^2 \gamma - 1) \\ -\sin^3 \gamma & 0 & -\sqrt{3} \sin \gamma (3 \cos^2 \gamma - 1) & 0 \end{bmatrix} \quad (\text{S9})$$

We seek to maximize the slow-relaxing part of the magnetization (elements [2,3] and [3,2] of the matrix in Eq. S9) in the rest of the experiment ( $t_1$  and  $t_2$  acquisition periods). Differentiating these elements with respect to  $\gamma$ , yields the optimal value,  $\gamma_{\text{opt}} = \sin^{-1}(\sqrt{8/27}) = 32.98^\circ$ . Note that the fast relaxing  $^1\text{H}$  magnetization (elements [1,2], [2,1] and [3,4], [4,3] of the matrix in Eq. S9) has to be eliminated subsequently, as for  $\gamma = \gamma_{\text{opt}}$ , this magnetization would generate a signal of opposite sign (that would partially cancel the signal of interest).

## Materials and Methods

**NMR Samples.** Two samples of ubiquitin were used in this work: 1) a {U-[ $^{15}\text{N}$ , $^2\text{H}$ ]; Ile $\delta$ 1-[ $^{13}\text{CH}_3$ ]; Leu,Val-[ $^{13}\text{CH}_3$ , $^{12}\text{CD}_3$ ]}-labeled, and 2) a {U-[ $^{15}\text{N}$ , $^2\text{H}$ ]; Ile $\delta$ 1-[ $^{13}\text{CHD}_2$ ]; Leu,Val-[ $^{13}\text{CHD}_2$ , $^{12}\text{CD}_3$ ]}-labeled one. The samples were expressed and purified as described previously<sup>6</sup> using appropriate  $\alpha$ -keto-acid precursors for generation of methyl isotopomers of  $^{13}\text{CH}_3$  or  $^{13}\text{CHD}_2$  variety.<sup>7</sup> In both samples, the concentration of ubiquitin was 1.3 mM in a buffer comprising 99.9%  $\text{D}_2\text{O}$ , 20 mM sodium phosphate, pH 6.5 (uncorrected), and 50 mM NaCl. The samples of {U-[ $^{15}\text{N}$ , $^2\text{H}$ ]; Ile $\delta$ 1-[ $^{13}\text{CH}_3$ ]}-labeled and {U-[ $^{15}\text{N}$ , $^2\text{H}$ ]; Ile $\delta$ 1-[ $^{13}\text{CHD}_2$ ]}-labeled Malate Synthase G (MSG) were expressed and purified as described previously.<sup>8,9</sup> Both MSG samples were dissolved in a buffer comprising 99.9%  $\text{D}_2\text{O}$ , 25 mM sodium phosphate (pH 7.0; uncorrected) and 5 mM  $\text{MgCl}_2$ .

The concentration of the {U-[ $^{15}\text{N}$ , $^2\text{H}$ ]; Ile $\delta$ 1-[ $^{13}\text{CHD}_2$ ]}-labeled MSG sample was 0.5 mM, while the {U-[ $^{15}\text{N}$ , $^2\text{H}$ ]; Ile $\delta$ 1-[ $^{13}\text{CH}_3$ ]}-labeled MSG was studied at two concentrations - 0.5 mM and 1.1 mM. Using a procedure described in detail previously,<sup>9,10</sup> we established the values of global rotational correlation time  $\tau_c$  (assumed isotropic in this study) of 46 ns and 64 ns for the 0.5 mM and 1.1 mM, samples, respectively, reflecting a notable viscosity (and hence  $\tau_c$ ) dependence of MSG samples on protein concentration.<sup>9,10</sup> Practically identical correlations between the  $^{13}\text{CH}_3$ - and  $^{13}\text{CHD}_2$ -derived methyl axis dynamics parameters [ $S_{\text{axis}}^2$ ;  $\tau_f$ ] were obtained for the two sample concentrations. Figure 4 of the main text shows the correlations obtained for a 0.5 mM sample.

**NMR Spectroscopy.** All spectra were recorded on a 600 MHz, AVANCE HD Bruker spectrometer equipped with a triple-axis (x, y, z) gradient cryogenic probe and were processed and analyzed using the NMRPipe/NMRDraw suite of programs and associated software.<sup>11</sup> Each of the data sets acquired with the pulse-schemes in Figs. 2, 5 and 6 comprised [96, 512] complex points in [ $^{13}\text{C}(t_1)$ ,  $^1\text{H}(t_2)$ ] dimensions translating to acquisition times of [32 ms, 64 ms] and [64 ms, 64 ms] for ILV- $\{^{13}\text{CH}_3\}$ -labeled ubiquitin (at both temperatures) and Ile $\delta$ 1- $\{^{13}\text{CH}_3\}$ -labeled MSG, respectively. Typically, 16 and 32 scans per FID were used for ubiquitin and MSG samples, respectively, with inter-scan relaxation delay of 1.5 sec. leading to net acquisition times of  $\sim$ 1.4 and  $\sim$ 2.9 hr. per 2D spectrum for the two proteins, respectively (note that experiments in Figs. 5 and 6 were not acquired for MSG). In all experiments, 2D data sets were recorded as a function of a parametrically varied relaxation delay,  $T$ . The following sets of delays  $T$  used for relaxation measurements of  $^{13}\text{C}$  magnetization modes in ILV- $\{^{13}\text{CH}_3\}$ -ubiquitin, ( $L_5 + L_6$ )  $R_{1\rho}$ : (0.2, 40, 80, 120, 160, 200) ms, and (0.2, 25, 50, 75, 100, 120) ms at 25 and 5  $^\circ\text{C}$ , respectively; ( $L_5 + L_6$ )  $R_1$ : (0, 60, 120, 180, 240, 300) ms, and (0, 50, 100, 150, 200, 250) ms at 25 and 5  $^\circ\text{C}$ , respectively; ( $L_1 \pm L_4$ )

$R_2$  ('free-precession'): (0, 12, 24, 36, 48, 60) ms, and (0, 6, 12, 18, 24, 30) ms at 25 and 5 °C, respectively;  $(L_1 + L_4) R_1$ : (0, 40, 80, 120, 160, 200) ms at both temperatures;  $(L_2 + L_3) R_{1\rho}$ : (0.1, 40, 80, 120, 160, 200) ms, and (0.1, 20, 40, 60, 80, 100) ms at 25 and 5 °C, respectively;  $(L_2 + L_3) R_1$ : (0, 40, 80, 120, 160, 200) ms, and (0, 30, 60, 90, 120, 150) ms at 25 and 5 °C, respectively;  $(L_2 - L_3) R_{1\rho}$ : (0.1, 20, 40, 60, 80, 100) ms, and (0.1, 10, 20, 30, 40, 50) ms at 25 and 5 °C, respectively; and  $(L_2 - L_3) R_1$ : (0, 30, 60, 90, 120, 150) ms, and (0, 15, 30, 45, 60, 75) ms at 25 and 5 °C, respectively. Delays  $T$  used in the measurements of  $(L_5 + L_6) R_{1\rho}$  and  $R_1$  in Ile $\delta$ 1- $\{^{13}\text{CH}_3\}$ -MSG (37 °C) were (0.2, 15, 30, 45, 60, 80) ms, and (0, 0.2, 0.4, 0.6, 0.8, 1.0) sec, respectively.

It is worth noting that experiments designed for relaxation measurements of the  $^{13}\text{C}$  magnetization modes belonging to the  $I = 3/2$  manifold (Figs. 5 and 6) are very sensitive to imperfections of the  $^1\text{H}$  180° pulses applied during relaxation delays  $T$  in order to eliminate contributions of methyl- $^{13}\text{C}$  CSA/ $^{13}\text{C}$ - $^1\text{H}$  dipolar cross correlated relaxation to the measured rates. Even slight deviations of these pulses from ideality can inter-convert the  $^{13}\text{C}$  magnetization modes of the  $I = 3/2$  manifold. Therefore, extreme care has to be exercised in optimization of these pulses and their phase-cycling as described in the captions to Figs. 5 and 6 of the main text. Simulations show that anti-phase  $^{13}\text{C}$  magnetization modes (such as, for example,  $L_2 - L_3$ ) are by far more sensitive to these imperfections. In this regard, we note that relaxation decays obtained in the measurements of the  $(L_2 - L_3)$  and  $(L_1 \pm L_4)$  modes performed *without* application of  $^1\text{H}$  180° pulses during delays  $T$  altogether, can be fitted to a function  $A\exp(-RT)\cosh(\eta T)$ , where  $R$  is the corresponding relaxation rate and  $\eta$ , the cross-correlated relaxation rate, providing results very similar to those reported in the main text.

The measurements of  $^{13}\text{C}$   $R_2/R_1$  relaxation rates in  $^{13}\text{CHD}_2$ -methyl-labeled samples were performed as described previously<sup>9</sup> (see Figure S1 in SI of ref. 9 for the pulse-scheme). Each of the data sets acquired on [ $^{13}\text{CHD}_2$ ]-labeled samples comprised [96, 512] complex points in [ $^{13}\text{C}(t_1)$ ,  $^1\text{H}(t_2)$ ] dimensions translating to acquisition times of [32 ms, 64 ms] and [64 ms, 64 ms] for ILV- $\{^{13}\text{CHD}_2\}$ -labeled ubiquitin (at both temperatures) and Ile $\delta$ 1- $\{^{13}\text{CHD}_2\}$ -labeled MSG, respectively. Typically, 16 and 32 scans per FID were used for  $\{^{13}\text{CHD}_2\}$ -labeled samples of ubiquitin and MSG, respectively, with inter-scan relaxation delay of 2.5 sec leading to net acquisition times of ~2.2 and ~4.5 hr. (for  $T = 0$ ) for the two samples, respectively.  $^{13}\text{C}$   $R_{1\rho}$  rates in  $^{13}\text{CHD}_2$  methyls of ubiquitin were measured using relaxation delays  $T$  of (4, 50, 100, 150, 200, 250, 300) ms and (4, 40, 80, 120, 160, 200, 240) ms at 25 and 5 °C, respectively, while the delays  $T$  of (0.04, 0.2, 0.4, 0.6, 0.8, 1.0, 1.2) sec and (0.04, 0.15, 0.3, 0.45, 0.6, 0.8, 1.0) sec were used for  $R_1$  measurements at 25 and 5 °C, respectively.  $^{13}\text{C}$   $R_{1\rho}$  and  $R_1$  rates in  $^{13}\text{CHD}_2$  groups of MSG were measured using relaxation delays  $T$  of (0.2, 10, 20, 30, 40, 50, 60) ms and (0.04, 0.5, 1.0, 1.5, 2.0, 2.5, 3.0) sec, respectively.

All  $^{13}\text{C}$   $R_{1\rho}$  measurements (for methyl isotopomers of both types) employed 2.0-kHz spin-lock fields. Errors in relaxation rates were estimated on the basis of the noise floor of the data sets. Average  $^{13}\text{C}$   $R_2$  rates of 2.25 and 4.54  $\text{s}^{-1}$  were obtained for ILV- $\{^{13}\text{CHD}_2\}$ -labeled methyls of ubiquitin at 25 and 5  $^\circ\text{C}$ , respectively, while the corresponding average  $R_1$  values of 0.75 and 0.96  $\text{s}^{-1}$  were obtained, respectively. Average  $^{13}\text{C}$   $R_2$  and  $R_1$  rates of 14.3 and 0.29  $\text{s}^{-1}$ , respectively, were obtained for Ile $\delta$ 1- $\{^{13}\text{CHD}_2\}$  methyls of MSG, practically identical to the rates reported earlier.<sup>9</sup>

**Data Analysis.** Relaxation rates were extracted from fits of peak intensities to a single-exponential decay function,  $A\exp(-RT)$ , where  $R$  is the corresponding relaxation rate.  $R_2$  values were calculated from  $R_{1\rho}$  rates using the relationship,  $R_2 = (R_{1\rho} - R_1 \cos^2 \lambda) / \sin^2 \lambda$ , where  $\lambda$  is the angle subtended by the direction of the effective spin-lock RF field with respect to the  $z$ -axis of the laboratory frame. In all calculations,  $\theta_{\text{axis,HH}} = 90^\circ$ ,  $\theta_{\text{axis,CH}} = 110.4^\circ$ , and  $r_{\text{CH}} = r_{\text{CD}} = 1.117 \text{ \AA}$  were used for intra-methyl interactions,<sup>12,13</sup> along with  $r_{\text{HH}} = \sqrt{3} \sin(\theta_{\text{axis,CH}}) r_{\text{CH}} = 1.813 \text{ \AA}$ , as in the previous studies of methyl axis dynamics by  $^1\text{H}$  relaxation.<sup>14</sup> Methyl  $^{13}\text{C}$  CSA ( $\Delta_C$ ) values of 25 ppm and 18 ppm was used for Leu/Val and Ile methyls, respectively.<sup>15</sup>

Eqs. S3-S4 were used in all calculations of relaxation rates for extraction of methyl axis dynamics parameters in this work, while Eqs. S5 form the basis for corrections applied to  $R_2/R_1$  relaxation rates of the  $(L_1 \pm L_4)$  magnetization modes (see main text). Analysis of  $^{13}\text{C}$   $R_2/R_1$  relaxation in  $^{13}\text{CHD}_2$  methyl isotopomers closely followed that described previously<sup>9</sup> (see SI of ref. 9 for expressions describing  $R_2$  and  $R_1$  relaxation rates in  $^{13}\text{CHD}_2$  methyls). Random errors in  $S^2_{\text{axis}}$  and  $\tau_f$  values were estimated on the basis of 300 Monte-Carlo simulations,<sup>16</sup> and were on average 1.1 and 1.7 % for  $^{13}\text{CH}_3$ -derived  $S^2_{\text{axis}}$  in ubiquitin at 25 and 5  $^\circ\text{C}$ , respectively, while the corresponding errors for  $^{13}\text{CHD}_2$ -derived  $S^2_{\text{axis}}$  were 0.5 and 0.8 %, respectively. Random errors for  $^{13}\text{CH}_3$ -derived and  $^{13}\text{CHD}_2$ -derived  $S^2_{\text{axis}}$  in MSG (37  $^\circ\text{C}$ ) were on average 2.5 and 1.8 %, respectively.

**Supplementary References**

1. Lipari, G.; Szabo, A. Model-Free Approach to the Interpretation of Nuclear Magnetic Relaxation in Macromolecules: 1. Theory and Range of Validity. *J. Am. Chem. Soc.* **1982**, *104*, 4546-4559.
2. Lipari, G.; Szabo, A. Model-Free Approach to the Interpretation of Nuclear Magnetic Relaxation in Macromolecules: 2. Analysis of Experimental Results. *J. Am. Chem. Soc.* **1982**, *104*, 4559-4570.
3. Skrynnikov, N. R.; Millet, O.; Kay, L. E. Deuterium Spin Probes of Side-Chain Dynamics in Proteins. 2. Spectral Density Mapping and Identification of Nanosecond Time-Scale Side-Chain Motions. *J. Am. Chem. Soc.* **2002**, *124*, 6449-6460.
4. Kay, L. E.; Bull, T. E. Heteronuclear Transverse Relaxation in AMX, AX<sub>2</sub>, and AX<sub>3</sub> Spin Systems. *J. Magn. Reson.* **1992**, *99*, 615-622.
5. Tugarinov, V.; Karamanos, T. K.; Ceccon, A.; Clore, G. M. Optimized NMR Experiments for the Isolation of I=1/2 Manifold Transitions in Methyl Groups of Proteins. *Chemphyschem* **2020**, *21*, 13-19.
6. Ceccon, A.; Tugarinov, V.; Bax, A.; Clore, G. M. Global Dynamics and Exchange Kinetics of a Protein on the Surface of Nanoparticles Revealed by Relaxation-Based Solution NMR Spectroscopy. *J. Am. Chem. Soc.* **2016**, *138*, 5789-5792.
7. Tugarinov, V.; Kanelis, V.; Kay, L. E. Isotope Labeling Strategies for the Study of High-Molecular-Weight Proteins by Solution NMR Spectroscopy. *Nat. Protoc.* **2006**, *1*, 749-754.
8. Tugarinov, V.; Muhandiram, R.; Ayed, A.; Kay, L. E. Four-Dimensional NMR Spectroscopy of a 723-Residue Protein: Chemical Shift Assignments and Secondary Structure of Malate Synthase G. *J. Am. Chem. Soc.* **2002**, *124*, 10025-10035.
9. Tugarinov, V.; Kay, L. E. Quantitative <sup>13</sup>C and <sup>2</sup>H NMR Relaxation Studies of the 723-Residue Enzyme Malate Synthase G Reveal a Dynamic Binding Interface. *Biochemistry* **2005**, *44*, 15970-15977.
10. Tugarinov, V.; Ollershaw, J. E.; Kay, L. E. Probing Side-Chain Dynamics in High Molecular Weight Proteins by Deuterium NMR Spin Relaxation: An Application to an 82-Kda Enzyme. *J. Am. Chem. Soc.* **2005**, *127*, 8214-8225.
11. Delaglio, F.; Grzesiek, S.; Vuister, G. W.; Zhu, G.; Pfeifer, J.; Bax, A. Nmrpipe: A Multidimensional Spectral Processing System Based on Unix Pipes. *J. Biomol. NMR* **1995**, *6*, 277-293.



12. Ishima, R.; Petkova, A. P.; Louis, J. M.; Torchia, D. A. Comparison of Methyl Rotation Axis Order Parameters Derived from Model-Free Analyses of <sup>2</sup>H and <sup>13</sup>C Longitudinal and Transverse Relaxation Rates Measured in the Same. *J. Am. Chem. Soc.* **2001**, *123*, 6164-6171.
13. Ottiger, M.; Bax, A. How Tetrahedral Are Methyl Groups in Proteins? A Liquid Crystal NMR Study. *J. Am. Chem. Soc.* **1999**, *121*, 4690-4695.
14. Tugarinov, V.; Kay, L. E. Relaxation Rates of Degenerate <sup>1</sup>H Transitions in Methyl Groups of Proteins as Reporters of Side-Chain Dynamics. *J. Am. Chem. Soc.* **2006**, *128*, 7299-7308.
15. Tugarinov, V.; Scheurer, C.; Brüschweiler, R.; Kay, L. E. Estimates of Methyl <sup>13</sup>C and <sup>1</sup>H CSA Values in Proteins from Cross-Correlated Spin Relaxation. *J. Biomol. NMR* **2004**, *30*, 397-406.
16. Kamith, U.; Shriver, J. W. Characterization of the Thermotropic State Changes in Myosin Subfragment-1 and Heavy Meromyosin by UV Difference Spectroscopy. *J. Biol. Chem.* **1989**, *264*, 5586-5592.
